# Supplementary material for: GPS Tracking of Free-Ranging Pigs to Evaluate Ring Strategies for the Control of Cysticercosis/Taeniasis in Peru
Source: PubMed Central journal article supplement (PMC4818035; doi:10.1371/journal.pntd.0004591), 2016-04-01
Supplement: pntd.0004591.s001.pdf [file pntd.0004591.s001.pdf]

**S1 – Map Appendix**  
**Village of Cachaco, Piura, Peru**

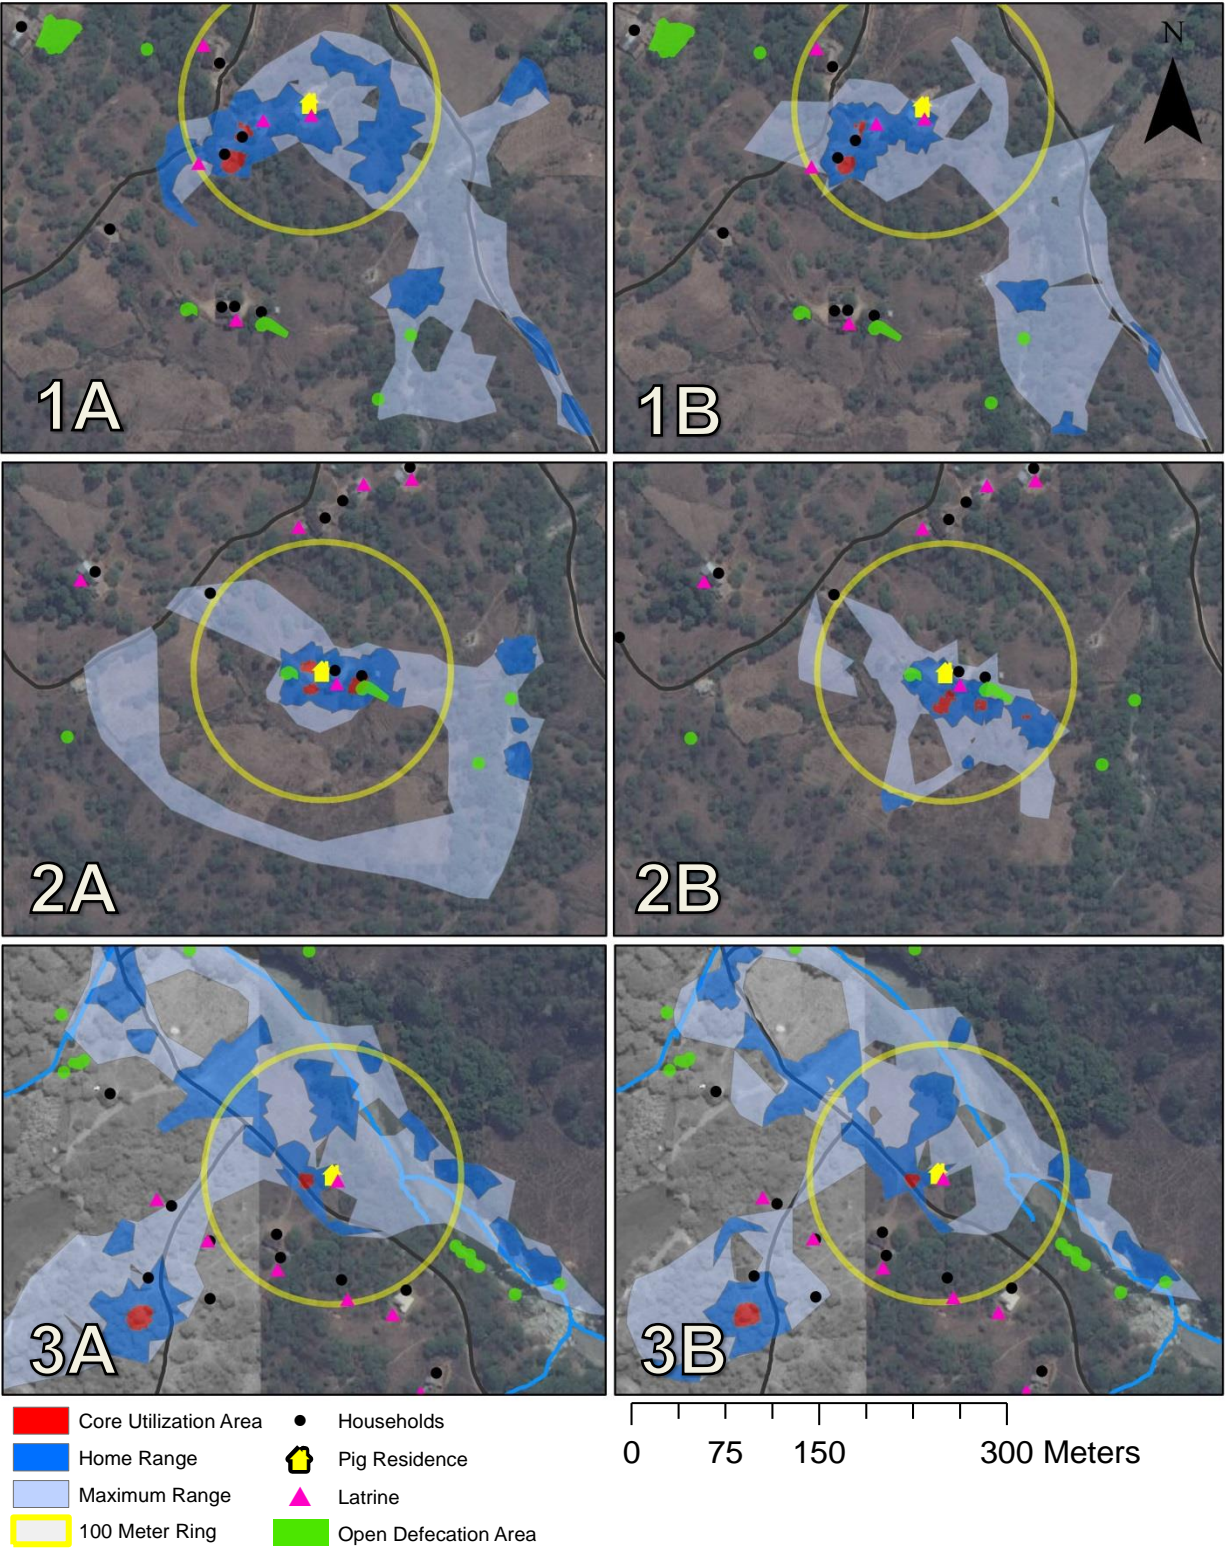

**Pigs Tracked**

Household 1: (1A) 24 month-old female; (1B) 2 month-old male  
 Household 2: (2A) 18 month-old female; (2B) 6 month-old female  
 Household 3: (3A) 5 month-old male; (3B) 5 month-old female



**S1 – Map Appendix**  
**Village of Cachaco, Piura, Peru**

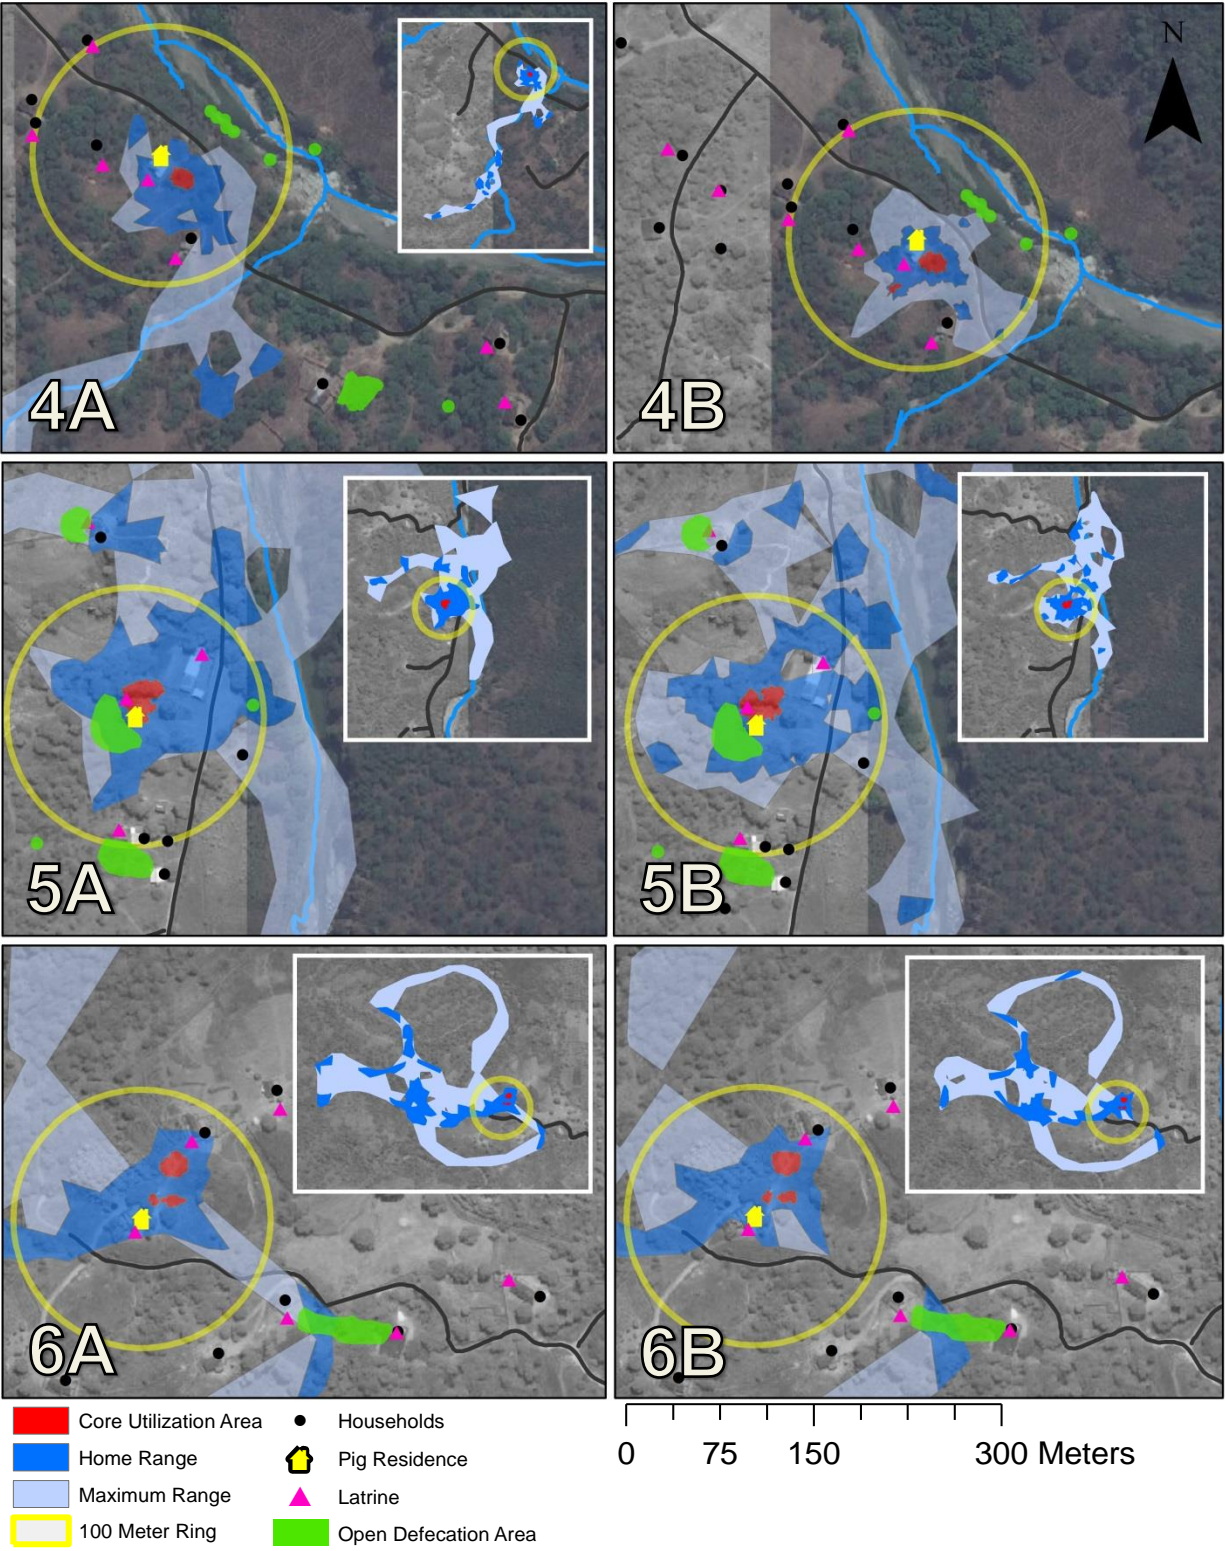

**Pigs Tracked**

Household 4: (4A) 18 month-old female; (4B) 3 month-old male  
 Household 5: (5A) 6 month-old female; (5B) 18 month-old female  
 Household 6: (6A) 8 month-old male; (6B) 8 month-old male



**S1 – Map Appendix**  
**Village of Cachaco, Piura, Peru**

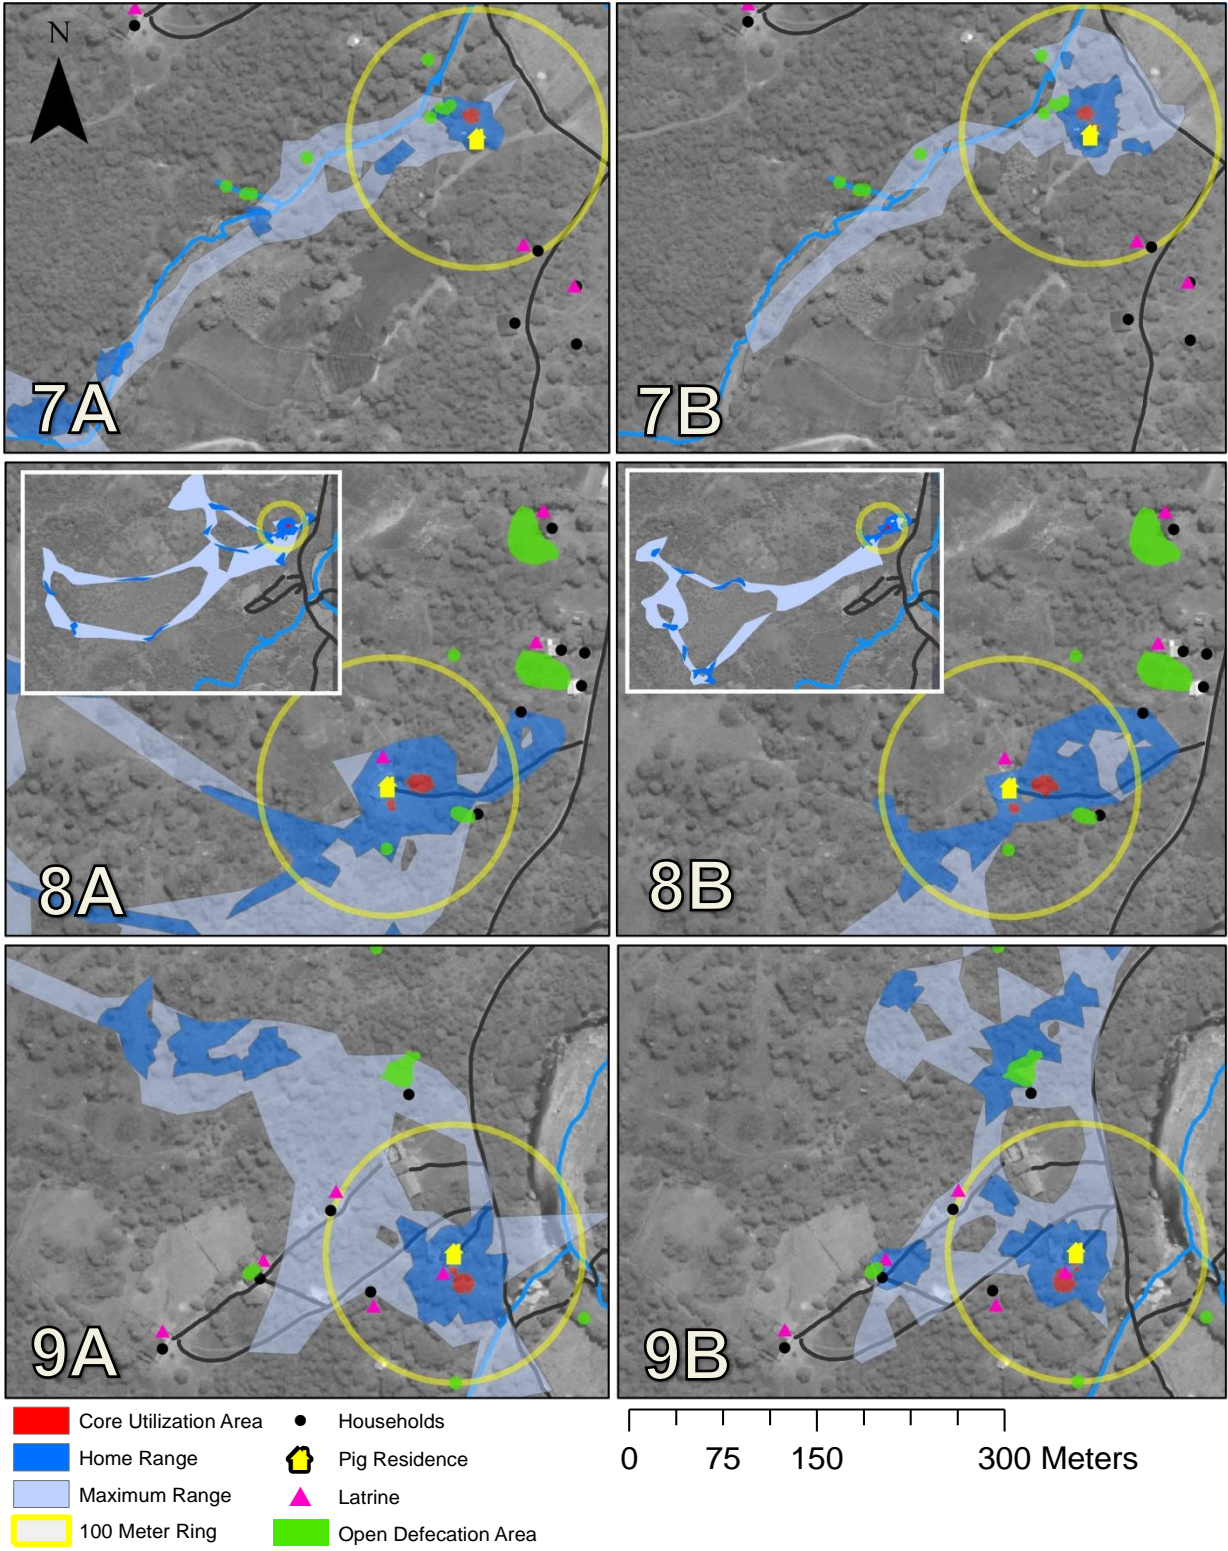

**Pigs Tracked**

Household 7: (7A) 3 month-old male; (7B) 3 month-old male  
 Household 8: (8A) 8 month-old female; (8B) 8 month-old female  
 Household 9: (9A) 4 month-old male; (9B) 18 month-old female



**S1 – Map Appendix**  
**Village of Cachaco, Piura, Peru**

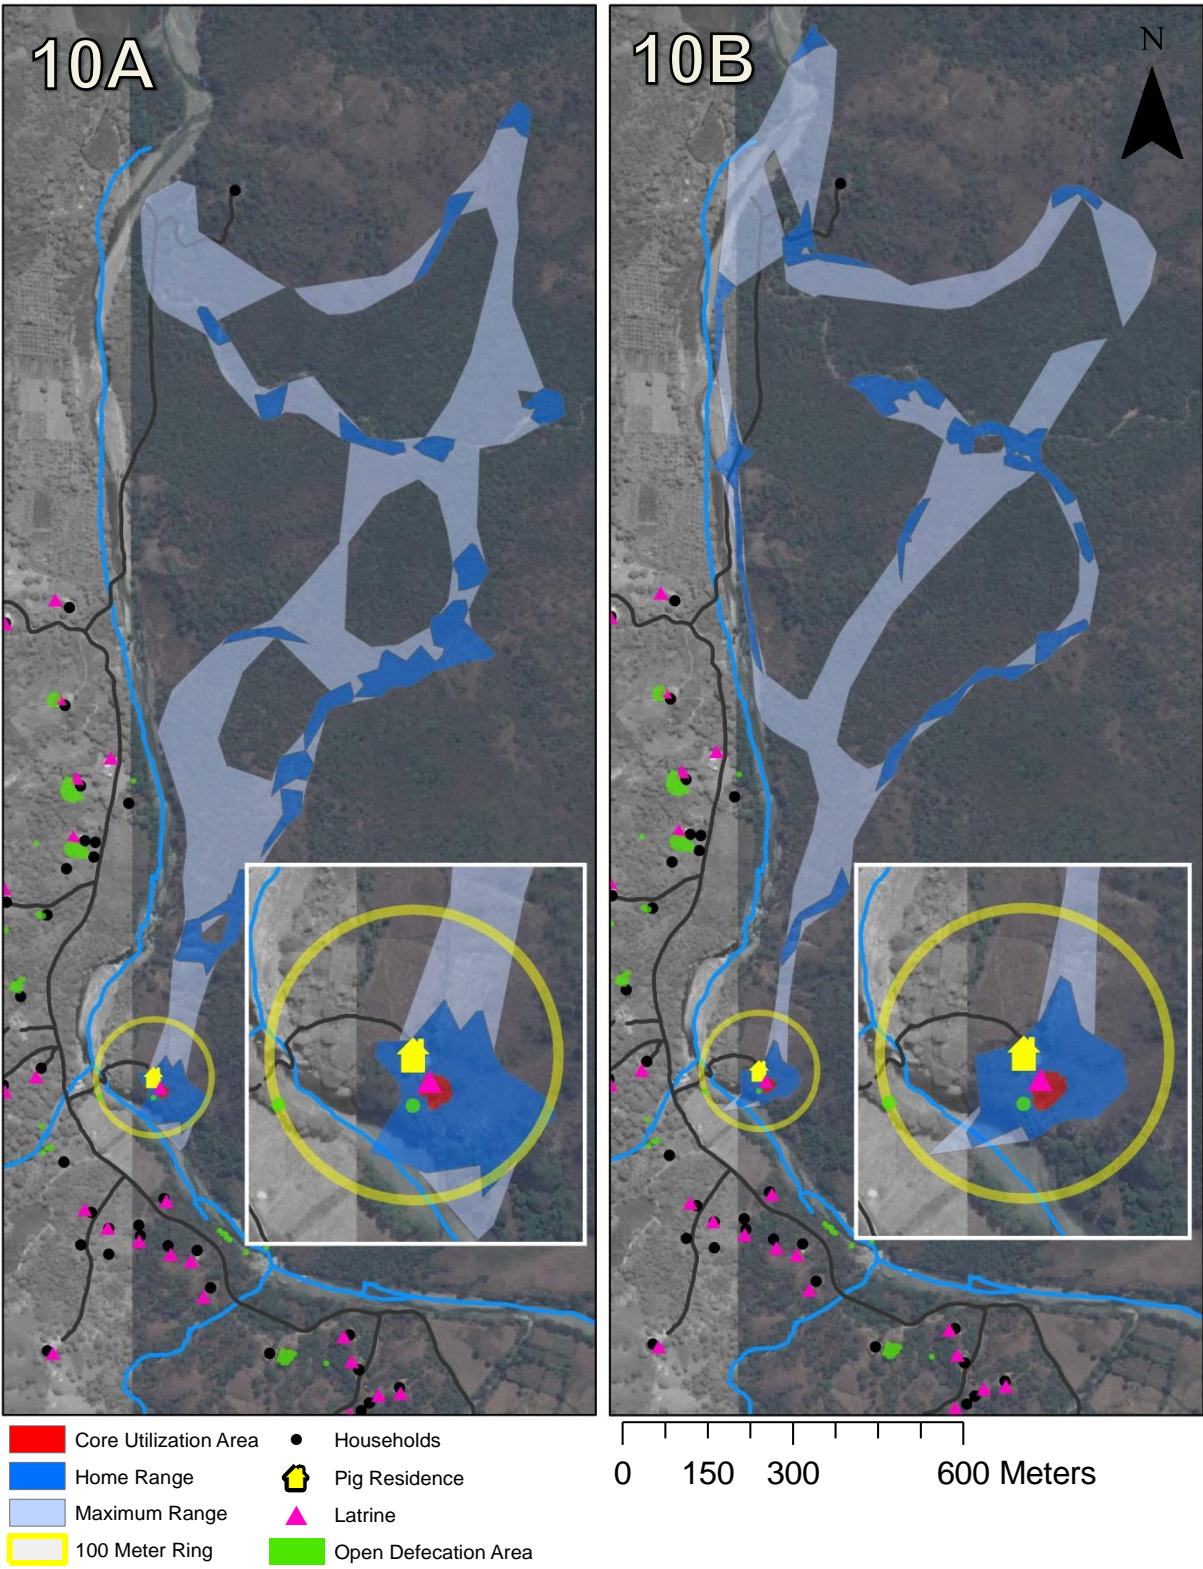

Pigs Tracked

Household 10: (10A) 6 month-old female; (10B) 8 month-old male
