# Supplementary material for: GPS Tracking of Free-Ranging Pigs to Evaluate Ring Strategies for the Control of Cysticercosis/Taeniasis in Peru
Source: PubMed Central journal article supplement (PMC4818035; doi:10.1371/journal.pntd.0004591), 2016-04-01
Supplement: pntd.0004591.s002.pdf [file pntd.0004591.s002.pdf]

**S2 – Map Appendix**  
**Village of Minas de Jambur, Piura, Peru**

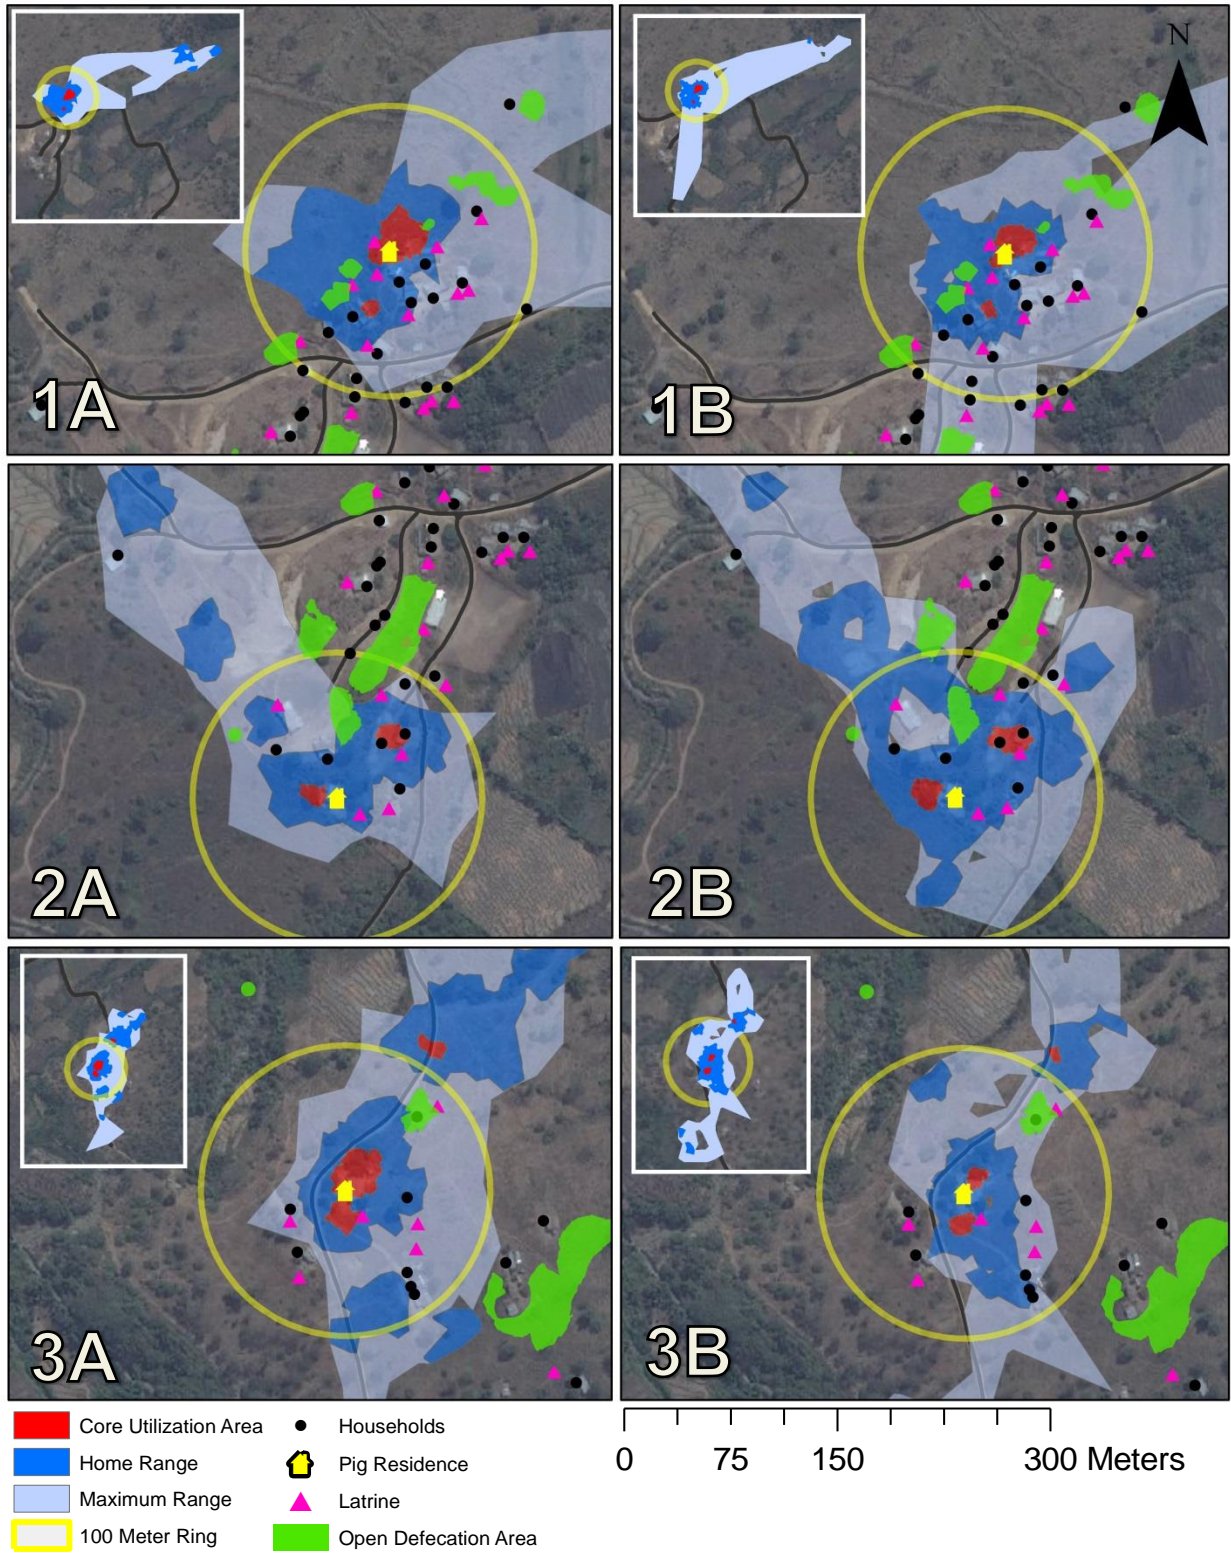

**Pigs Tracked**

Household 1: (1A) 6 month-old male; (1B) 6 month-old female  
 Household 2: (2A) 5 month-old female; (2B) 5 month-old male, castrated  
 Household 3: (3A) 4 month-old female; (3B) 12 month-old male, castrated



**S2 – Map Appendix**  
**Village of Minas de Jambur, Piura, Peru**

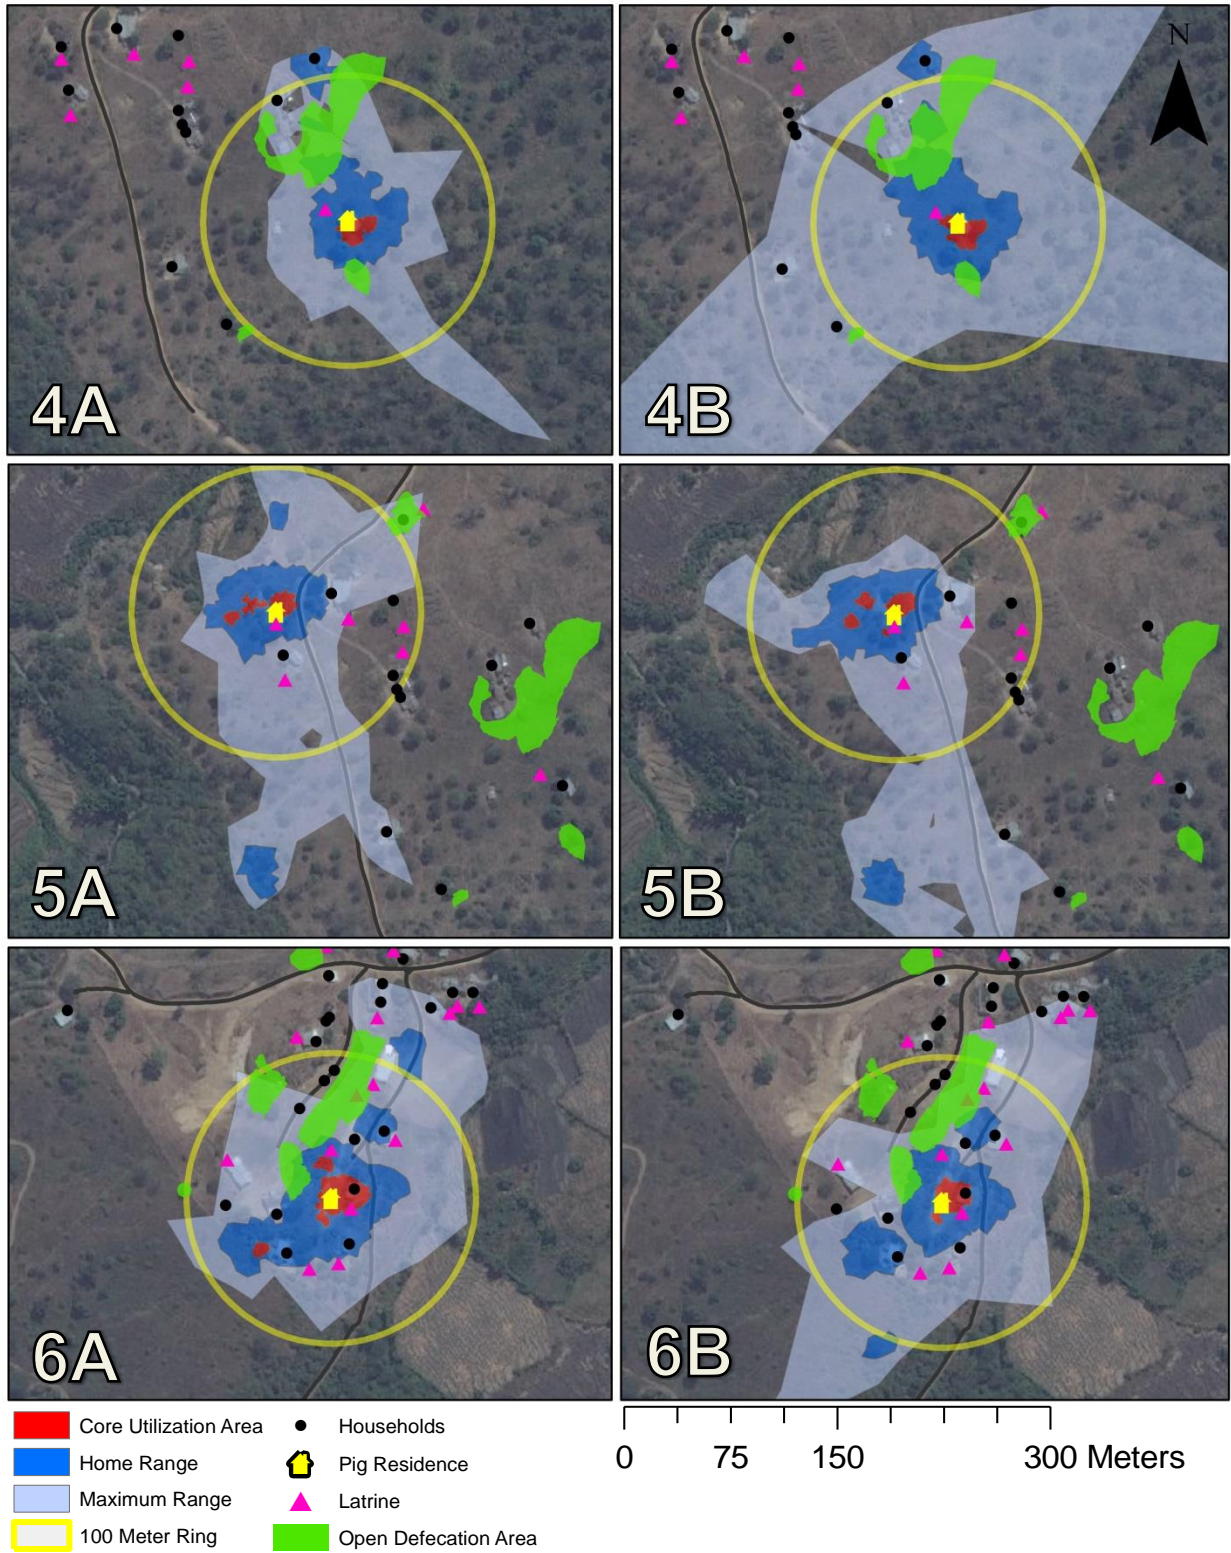

**Pigs Tracked**

Household 4: (4A) 6 month-old female; (1B) 6 month-old male, castrated  
 Household 5: (5A) 12 month-old female; (5B) 12 month-old male, castrated  
 Household 6: (6A) 6 month-old female; (6B) 6 month-old male, castrated



**S2 – Map Appendix**  
**Village of Minas de Jambur, Piura, Peru**

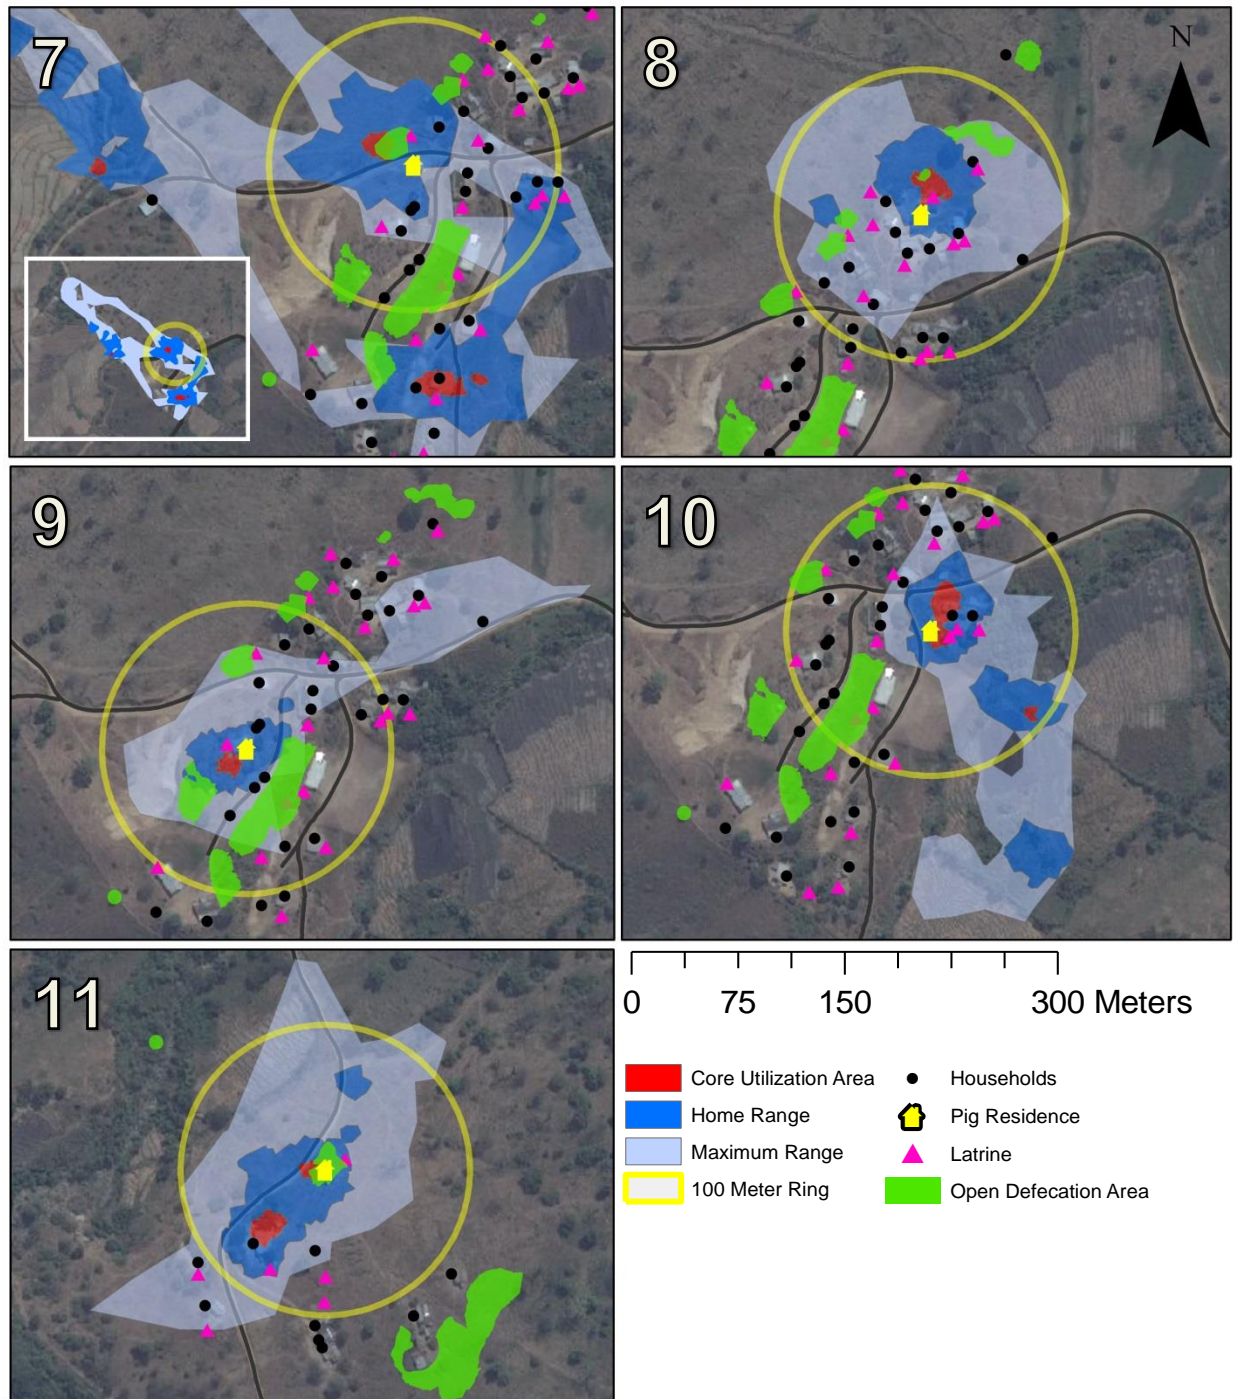

Pigs Tracked (only one pig tracked per household)

- Household 7: 12 month-old male
- Household 8: 4 month-old male, castrated
- Household 9: 4 month-old female
- Household 10: 4 month-old male, castrated
- Household 11: 4 month-old male, castrated
